# Supplementary material for: Aberrant intestinal microbiota in individuals with prediabetes
Source: Springer Nature journal article supplement (doi:10.1007/s00125-018-4550-1), 2018-01-29
Supplement: MOESM1 [file 15421676]

## Electronic Supplementary Material

**ESM Methods** Supplementary information about amplification of 16S rRNA genes and analysis of quality filtered reads

**ESM Table 1** Characteristics of the study population stratified by sub-cohort

**ESM Table 2** Diet in sub-cohort 1

**ESM Table 3** Genera and operational taxonomic units that display differential abundance among individuals with prediabetes and normal glucose regulation

**ESM Table 4** Association between differentially abundant genera and operational taxonomic units and clinical biomarkers relevant for diabetes

**ESM Table 5** Associations between  $\alpha$ -diversity estimated as phylogenetic diversity and clinical biomarkers

**ESM Table 6.** List of the 23 OTUs that were found as highly abundant in the inocula and germfree Swiss Webster recipient mice

**ESM Fig. 1** Principal coordinate analysis of the overall composition of the faecal microbiota

**ESM Fig. 2** Species richness in the faecal microbiota

**ESM Fig. 3** Faecal transfer from human donors with distinct glucose regulation in conventional C57Bl/6J mice

**ESM Fig. 4** Faecal transfer from human donors with distinct glucose regulation in germfree Swiss Webster mice

## **ESM Methods**

### ***Supplementary information about amplification of 16S rRNA genes***

16S rRNA genes were amplified in duplicate reactions in volumes of 25 µl containing 1x Five Prime Hot Master Mix (5 PRIME GmbH), 200 nM of each primer, 0.4 mg/ml BSA, 5% DMSO and 20 ng of total faecal genomic DNA. PCR was carried out under the following conditions: initial denaturation for 3 min at 94°C, followed by 25 cycles of denaturation for 45 sec at 94°C, annealing for 60 sec at 52°C and elongation for 90 sec at 72°C, and a final elongation step for 10 min at 72°C. Duplicates were combined, purified with the NucleoSpin Gel and PCR Clean-up kit (Macherey-Nagel) and quantified using the Quant-iT PicoGreen dsDNA kit (Invitrogen). Purified PCR products were diluted to 5 ng/µl and pooled in equal amounts. The pooled amplicons were purified again using Ampure magnetic purification beads (Agencourt) to remove short amplification products.

### ***Supplementary information about analysis of quality filtered reads***

Sequences were clustered into operational taxonomic units (OTUs) at a 97% identity threshold using an open-reference OTU picking approach with UCLUST [1] against the Greengenes reference database [2] (13\_8 release). All sequences that failed to cluster when tested against the Greengenes database were used as input for picking OTUs de novo. Representative sequences for the OTUs were Greengenes reference sequences or cluster seeds, and were taxonomically assigned using the Greengenes taxonomy and the Ribosomal Database Project Classifier [3]. Representative OTUs were aligned using PyNAST [4] and used to build a phylogenetic tree with FastTree [5], which was used to calculate  $\alpha$ - and  $\beta$ -diversity of samples using Phylogenetic Diversity [6] and UniFrac [7]. Three-dimensional principal coordinates analysis (PCoA) plots were visualized using Emperor [8]. Chimeric sequences were identified with ChimeraSlayer [9].

## References

- [1] Edgar RC (2010) Search and clustering orders of magnitude faster than BLAST. *Bioinformatics* 26: 2460-2461
- [2] DeSantis TZ, Hugenholtz P, Larsen N, et al. (2006) Greengenes, a Chimera-Checked 16S rRNA Gene Database and Workbench Compatible with ARB. *Applied and Environmental Microbiology* 72: 5069-5072
- [3] Wang Q, Garrity GM, Tiedje JM, Cole JR (2007) Naïve Bayesian Classifier for Rapid Assignment of rRNA Sequences into the New Bacterial Taxonomy. *Applied and Environmental Microbiology* 73: 5261-5267
- [4] Caporaso JG, Bittinger K, Bushman FD, DeSantis TZ, Andersen GL, Knight R (2010) PyNAST: a flexible tool for aligning sequences to a template alignment. *Bioinformatics* 26: 266-267
- [5] Price MN, Dehal PS, Arkin AP (2010) FastTree 2--approximately maximum-likelihood trees for large alignments. *PLoS One* 5: e9490
- [6] Faith DP (1992) Conservation evaluation and phylogenetic diversity. *Biological Conservation* 61: 1-10
- [7] Lozupone C, Knight R (2005) UniFrac: a New Phylogenetic Method for Comparing Microbial Communities. *Applied and Environmental Microbiology* 71: 8228-8235
- [8] Vázquez-Baeza Y, Pirrung M, Gonzalez A, Knight R (2013) EMPeror: a tool for visualizing high-throughput microbial community data. *GigaScience* 2: 1-4
- [9] Haas BJ, Gevers D, Earl AM, et al. (2011) Chimeric 16S rRNA sequence formation and detection in Sanger and 454-pyrosequenced PCR amplicons. *Genome Research* 21: 494-504

**ESM Table 1 Characteristics of the study population stratified by sub-cohort**

|                                             | Sub-cohort 1              |                    | Sub-cohort 2              |                    |
|---------------------------------------------|---------------------------|--------------------|---------------------------|--------------------|
|                                             | Normal glucose regulation | Prediabetes        | Normal glucose regulation | Prediabetes        |
| No.                                         | 71                        | 71                 | 63                        | 63                 |
| Women, no. (%)                              | 21 (30)                   | 21 (30)            | 32 (51)                   | 32 (51)            |
| Age, years                                  | 61 (55;66)                | 63 (57;67)         | 62 (56;68)                | 64 (57;69)         |
| Fasting plasma glucose, mmol/l              | 5.2 (4.9;5.4)             | 6.3 (6.1;6.5)      | 5.3 (5.0;5.4)             | 6.4 (6.2;6.6)      |
| HbA <sub>1c</sub> , mmol/mol                | 34 (33;36)                | 37 (34;39)         | 34 (33;36)                | 39 (37;42)         |
| HbA <sub>1c</sub> , %                       | 5.3 (5.2;5.5)             | 5.5 (5.3;5.7)      | 5.3 (5.2;5.4)             | 5.8 (5.6;6.0)      |
| Fasting plasma insulin, pmol/l              | 50.0 (30.6;69.5)          | 84.7 (55.6;128)    | 49.7 (33.7;65.6)          | 72.6 (55.2;107)    |
| Fasting plasma C-peptide, mmol/l            | 0.60 (0.42;0.73)          | 0.80 (0.65;1.08)   | 0.56 (0.45;0.71)          | 0.92 (0.75;1.14)   |
| HOMA-IR                                     | 2.00 (1.18;2.75)          | 4.05 (2.56;6.21)   | 1.86 (1.30;2.60)          | 3.66 (2.45;5.14)   |
| Fasting plasma hsCRP, nmol/l                | 6.67 (4.10;14.57)         | 13.43 (5.05;28.38) | 7.71 (4.48;14.86)         | 15.52 (6.38;24.67) |
| BMI, kg/m <sup>2</sup>                      | 26.2 (24.1;27.7)          | 27.0 (24.5;30.1)   | 25.0 (23.0;27.2)          | 28.7 (26.0;31.1)   |
| Waist circumference, cm                     | 91 (86;98)                | 96 (89;104)        | 86 (80;96)                | 102 (98;109)       |
| Fasting plasma triacylglycerol, mmol/l      | 0.95 (0.82;1.30)          | 1.29 (0.90;1.92)   | 1.02 (0.84;1.28)          | 1.36 (1.07;1.93)   |
| Treatment for hypertension, no (%)          | 22 (31)                   | 28 (39)            | 17 (27)                   | 19 (30)            |
| Treatment for hypercholesterolemia, no. (%) | 10 (14)                   | 11 (15)            | 12 (19)                   | 8 (13)             |

Sub-cohort 1: individuals with prediabetes were recruited from the DanFunD study.

Sub-cohort 2: individuals with prediabetes were recruited from the Danish part of the IMI-DIRECT study.

Individuals with normal glucose regulation were recruited only from the DanFunD and matched to individuals with prediabetes with respect to sex and age (n=134).

Values are median (IQR) unless otherwise indicated. Individuals who received treatment for hypercholesterolemia were excluded from analyses of triacylglycerol levels. Plasma insulin, HOMA-IR, hsCRP, and triacylglycerol were only available for 254, 254, 267, and 227 individuals, respectively.

**ESM Table 2 Diet in sub-cohort 1**

|                                                     | Normal glucose regulation<br>(n=71) | Prediabetes<br>(n = 71) | <i>p</i> value |
|-----------------------------------------------------|-------------------------------------|-------------------------|----------------|
| Meat (beef, veal, pork, or lamb), servings per week | 3.5 (1.5-3.5)                       | 3.5 (1.5-6.0)           | 0.07           |
| Poultry, servings per week                          | 1.5 (1.5-1.5)                       | 1.5 (1.5-1.5)           | 0.23           |
| Fish, servings per week                             | 1.5 (1.5-1.5)                       | 1.5 (0.0-1.5)           | 0.19           |
| Vegetables, servings per day                        | 1.7 (0.9-2.1)                       | 1.5 (1.1-2.1)           | 0.77           |
| Fruit, servings per day                             | 1.5 (1.5-3.5)                       | 1.5 (0.6-1.5)           | 0.02           |

All individuals were recruited from the DanFunD study.

Numbers are median (IQR). *p* values are from Wilcoxon rank sum tests.

**ESM Table 3 and ESM Table 4. See Excel sheet: ESM Table 3 and 4**

**ESM Table 5 Associations between  $\alpha$ -diversity estimated as phylogenetic diversity and clinical biomarkers**

|                                        | n   | Effect estimate (95% CI)    | <i>p</i> value |
|----------------------------------------|-----|-----------------------------|----------------|
| Fasting plasma glucose, mmol/l         | 268 | -0.01 (-0.03 to -0.001)     | 0.03           |
| HbA <sub>1c</sub> , mmol/mol           | 268 | -0.06 (-0.14 to 0.01)       | 0.11           |
| HbA <sub>1c</sub> , %                  | 268 | -0.06 (-0.14 to 0.01)       | 0.11           |
| Log(plasma insulin, pmol/l)            | 254 | -0.01 (-0.03 to -0.001)     | 0.03           |
| Log(plasma C-peptide, mmol/l)          | 268 | -0.009 (-0.02 to -0.0006)   | 0.04           |
| Log(HOMA-IR)                           | 254 | -0.02 (-0.03 to -0.002)     | 0.02           |
| Log(plasma C-reactive protein, nmol/l) | 267 | -0.03 (-0.05 to -0.01)      | 0.001          |
| Log(BMI, kg/m <sup>2</sup> )           | 268 | -0.003 (-0.006 to -0.00001) | 0.049          |
| Waist circumference, cm                | 268 | -0.32 (-0.58 to -0.06)      | 0.02           |
| Log(plasma triacylglycerol, mmol/l)    | 227 | -0.01 (-0.02 to -0.004)     | 0.008          |

Effect estimates and *p* values are from linear regression analyses. Effect estimates represent the effect of a one unit increase in  $\alpha$ -diversity on the clinical biomarkers.

**ESM Table 6. List of the 23 OTUs that were found as highly abundant in the inocula and germfree Swiss Webster recipient mice**

| <b>Taxonomy</b>                                                                                  | <b>OTU</b> | <b>Increased in (human cohort)</b> | <b>Increased in experiment 1 (GF recipients)</b> | <b>Increased in experiment 2 (GF recipients)</b> |
|--------------------------------------------------------------------------------------------------|------------|------------------------------------|--------------------------------------------------|--------------------------------------------------|
| k_Bacteria; p_Bacteroidetes; c_Bacteroidia; o_Bacteroidales; f_Bacteroidaceae; g_Bacteroides; s_ | 3439403    | Controls                           | ns                                               | * (Cases)                                        |
| k_Bacteria; p_Bacteroidetes; c_Bacteroidia; o_Bacteroidales; f_Bacteroidaceae; g_Bacteroides; s_ | 332732     | Controls                           | * (Cases)                                        | ** (Cases)                                       |
| k_Bacteria; p_Bacteroidetes; c_Bacteroidia; o_Bacteroidales; f_Bacteroidaceae; g_Bacteroides; s_ | 4468234    | Controls                           | ns                                               | ns                                               |
| k_Bacteria; p_Bacteroidetes; c_Bacteroidia; o_Bacteroidales; f_Rikenellaceae; g_; s_             | 4476780    | Controls                           | ns                                               | ** (Controls)                                    |
| k_Bacteria; p_Firmicutes; c_Clostridia; o_Clostridiales; f_; g_; s_                              | 146564     | Controls                           | ns                                               | ns                                               |
| k_Bacteria; p_Firmicutes; c_Clostridia; o_Clostridiales; f_; g_; s_                              | 584107     | Controls                           | ns                                               | ns                                               |
| k_Bacteria; p_Firmicutes; c_Clostridia; o_Clostridiales; f_Clostridiaceae; g_; s_                | 4202174    | Controls                           | ns                                               | ns                                               |
| k_Bacteria; p_Firmicutes; c_Clostridia; o_Clostridiales; f_Clostridiaceae; g_Clostridium; s_     | 4465124    | Controls                           | ns                                               | ns                                               |
| k_Bacteria; p_Firmicutes; c_Clostridia; o_Clostridiales; f_Lachnospiraceae; g_Blautia; s_        | 2137906    | Controls                           | ns                                               | 0.06 (Controls)                                  |
| k_Bacteria; p_Firmicutes; c_Clostridia; o_Clostridiales; f_Lachnospiraceae; g_Lachnospira; s_    | 176269     | Controls                           | ns                                               | ns                                               |
| k_Bacteria; p_Firmicutes; c_Clostridia; o_Clostridiales; f_Ruminococcaceae; g_; s_               | 819353     | Controls                           | ns                                               | * (Controls)                                     |



|                                                                                                                              |         |          |              |              |
|------------------------------------------------------------------------------------------------------------------------------|---------|----------|--------------|--------------|
| k_Bacteria; p_Firmicutes; c_Clostridia; o_Clostridiales; f_Ruminococcaceae; g_; s_                                           | 4364405 | Controls | ns           | ns           |
| k_Bacteria; p_Firmicutes; c_Clostridia; o_Clostridiales; f_Ruminococcaceae; g_; s_                                           | 184114  | Controls | ns           | * (Controls) |
| k_Bacteria; p_Firmicutes; c_Clostridia; o_Clostridiales; f_Ruminococcaceae; g_; s_                                           | 181174  | Controls | ns           | ns           |
| k_Bacteria; p_Firmicutes; c_Clostridia; o_Clostridiales; f_Ruminococcaceae; g_; s_                                           | 540055  | Controls | ns           | ns           |
| k_Bacteria; p_Firmicutes; c_Clostridia; o_Clostridiales; f_Ruminococcaceae; g_; s_                                           | 178845  | Controls | ns           | ns           |
| k_Bacteria; p_Firmicutes; c_Clostridia; o_Clostridiales; f_Ruminococcaceae; g_Ruminococcus; s_                               | 2943548 | Controls | ns           | ns           |
| k_Bacteria; p_Proteobacteria; c_Deltaproteobacteria; o_Desulfovibrionales; f_Desulfovibrionaceae; g_Bilophila; s_            | 359872  | Controls | * (Controls) | * (Cases)    |
| k_Bacteria; p_Verrucomicrobia; c_Verrucomicrobiae; o_Verrucomicrobiales; f_Verrucomicrobiaceae; g_Akkermansia; s_muciniphila | 4306262 | Controls | ns           | ** (Cases)   |
| k_Bacteria; p_Firmicutes; c_Bacilli; o_Lactobacillales; f_Streptococcaceae; g_Streptococcus; s_                              | 4425214 | Cases    | ns           | ns           |
| k_Bacteria; p_Firmicutes; c_Clostridia; o_Clostridiales; f_Lachnospiraceae                                                   | 4443846 | Cases    | ns           | ns           |
| k_Bacteria; p_Firmicutes; c_Clostridia; o_Clostridiales; f_Lachnospiraceae; g_[Ruminococcus]; s_gnavus                       | 188047  | Cases    | ns           | * (Controls) |
| k_Bacteria; p_Firmicutes; c_Clostridia; o_Clostridiales; f_Lachnospiraceae; g_Dorea; s_                                      | 181167  | Cases    | ns           | * (Controls) |

\*  $p < 0.05$ , \*\*  $p < 0.01$

GF: Germfree; ns: non-significant

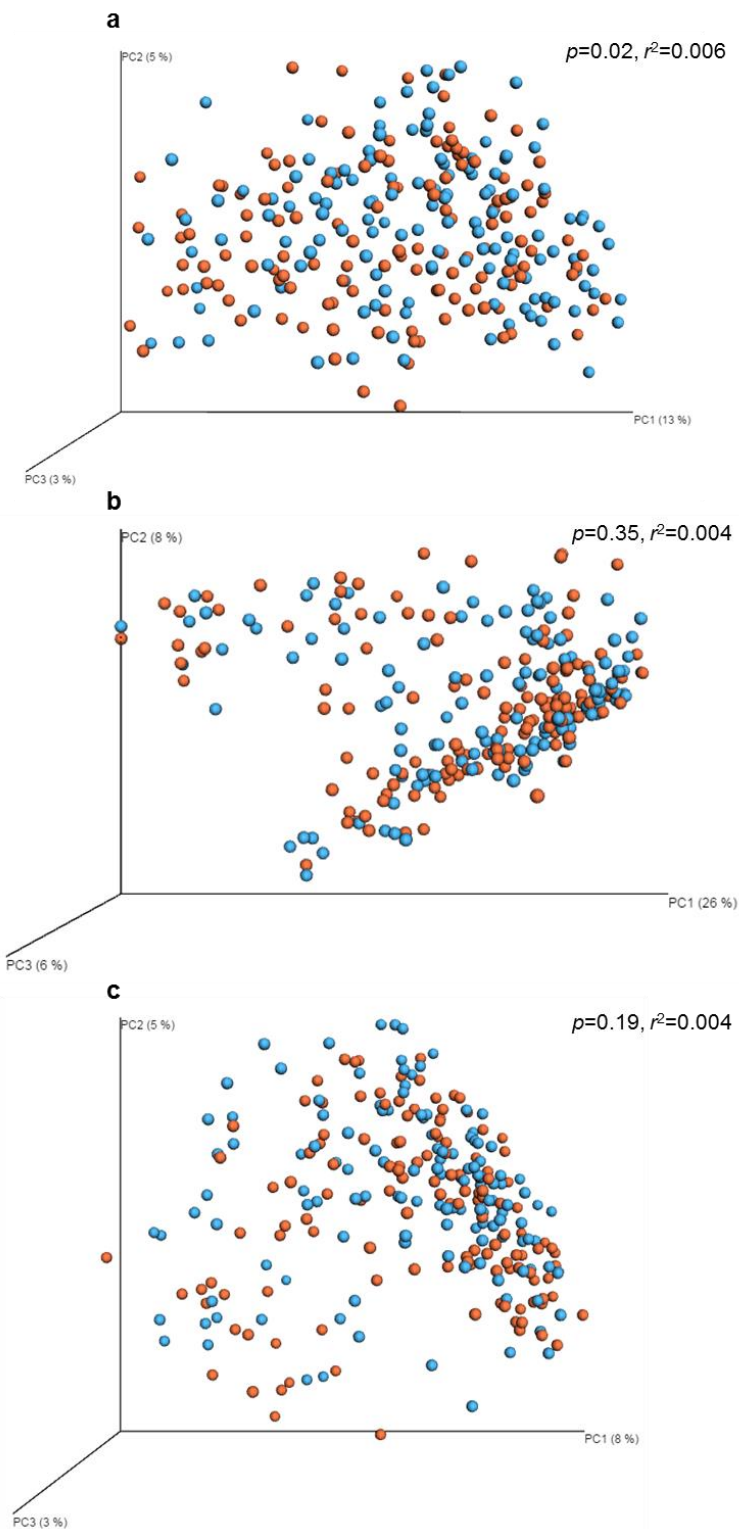

**ESM Fig. 1 Principal coordinate analysis of the overall composition of the faecal microbiota**  
 The principal coordinate analysis is based on **a**) unweighted UniFrac, **b**) weighted UniFrac and **c**) Bray-Curtis distances. Blue dots represent normal glucose regulation and red dots represent impaired glucose regulation.  $p$  values are from multivariate non-parametric analysis of variance implemented in the Adonis function (999 permutations) in the R vegan package.

a

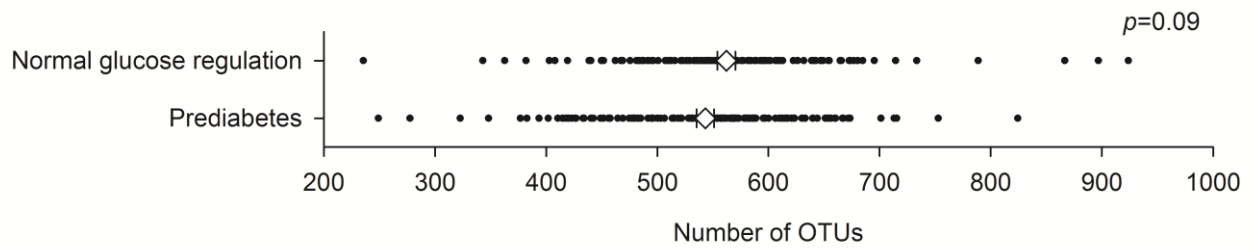

b

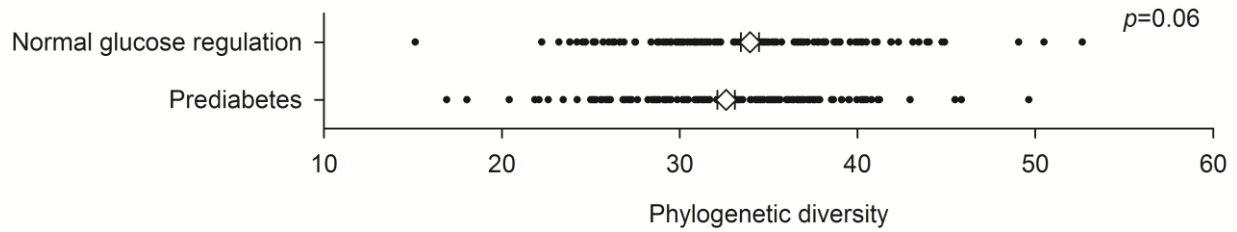

**ESM Fig. 2 Species richness in the faecal microbiota**

Species richness was estimated as number of OTUs (a) and phylogenetic diversity (b). Diamonds represent the mean and horizontal bars represent  $\pm$  SEM.



**ESM Fig. 3 Faecal transfer from human donors with distinct glucose regulation in conventional C57Bl/6J mice.**

(a) Glucose tolerance test of conventional C57Bl/6J mice fed Western diet and gavaged with faecal microbiota from four pooled donors with prediabetes (cases, n = 17), four pooled individuals with normal glucose regulation (controls, n = 17), or PBS (sham, n = 12) for four weeks; (b) Glucose stimulated insulin secretion during glucose tolerance test on mice from a; (c) Fasting blood glucose derived immediately before the glucose tolerance test described in a. Data are presented as mean  $\pm$  SE and statistical evaluation was performed by two-way ANOVA, repeated measurements with Bonferroni post hoc test (a-b) and Wilcoxon rank-sum tests (c). † =  $p < 0.05$  between cases and sham, ‡ and ‡‡ =  $p < 0.05$  and  $< 0.01$ , respectively, between controls and sham. White colour: controls. Grey colour: cases. Black colour: sham.

(d) Principal coordinate analysis (PCoA) plot of faecal microbiota composition in the C57Bl/6J transplanted mice based on weighted UniFrac. The dots in the PCoA plot indicate either faecal samples collected from each mouse before (faeces\_start) and at the end of the four-week gavage period (faeces\_end) or caecal samples collected at the termination of the experiment (caecum\_end); the values in brackets on the axes show the percentage of variation explained by the first three principal coordinates (PC). Gavage of human microbiota and sham treatment significantly shifted the composition of the microbiota ( $p = 0.001$ ,  $r^2 = 0.314$ ; Adonis 999 permutations). However, we observed no clustering of samples according to the type of inoculum ( $p = 0.628$ ,  $r^2 = 0.014$ ; Adonis 999 permutations), indicating that sham treatment and gavage of human microbiota had similar effects on the gut microbiota in the recipient mice. (e-f) Tukey box plots showing weighted UniFrac distances calculated to measure the dissimilarity of overall microbiota composition between (e) mouse faecal samples and controls inoculum and (f) mouse faecal samples and cases inoculum (0=identical; 1=completely different). At the end of the experiment, all faecal samples including those of sham mice became more similar to the controls inoculum, while only the faecal samples of mice that received human microbiota from cases became more similar to the cases inoculum (\*  $p < 0.05$  and \*\*\*  $p < 0.001$  according to Wilcoxon matched-pairs signed rank test). (g-h) Tukey box plots showing the number of OTUs shared between (g) mouse faecal samples and controls inoculum and (h) mouse faecal samples and cases inoculum. The results show that gavage treatment *per se* significantly shifted the overall composition of the gut microbiota, and that more OTUs were shared between mouse faecal samples and controls inoculum. These results might indicate a more successful transfer of OTUs from the controls inoculum, which could also depend on its higher richness (OTUs in the controls inoculum = 346; OTUs in the cases inoculum = 202; OTUs shared between controls inoculum and cases inoculum = 154). (i) Bar plots showing the mean relative abundance of all microbial genera (n=68) identified in the faecal and caecal samples of the transplanted mice before (start) and at the end of the four-week gavage period (end). (j) Bar plots showing the relative abundance in the cases and control inocula of the five microbial genera that differed significantly in the human cohort. (k-l) Tukey box plots indicating the relative abundance of the five genera in the mouse faecal microbiota (k) before (faeces\_start) and (l) at the end of the four-week gavage period (faeces\_end). Stars (\*) indicate significantly different abundance for OTUs at the end of the gavage period compared to before (\*  $p < 0.05$ , \*\*  $p < 0.01$  and \*\*\*  $p < 0.001$  according to Wilcoxon matched-pairs signed rank test). (m) Bar plots showing the relative abundance in the cases and control inocula of the microbial OTUs that differed significantly in the human cohort; only 8 out of the 36 OTUs that differed significantly in the human cohort were found among the highly abundant OTUs present in the inocula and in the mouse samples (7 OTUs, on the left of the dotted line, had increased abundance in the controls in the human cohort while 1 OTU, on the right of the dotted line, had increased abundance in the cases in the human cohort (ESM Table 3); the identification numbers of the OTUs are indicated in the plots). (n-o) Tukey box plots indicating the relative abundance of the 8/36 OTUs in the mouse faecal microbiota (n) before (faeces\_start) and (o) at the end of the four-week gavage period (faeces\_end). Stars (\*) indicate significantly different abundance for OTUs at the end of the gavage period compared to before (\*  $p < 0.05$ , \*\*  $p < 0.01$  and \*\*\*\*  $p < 0.0001$  according to Wilcoxon matched-pairs signed rank test). These results point to a lack of colonization in the conventional C57Bl/6J mice of key microbial taxa that were differentially abundant in the controls and cases human gut microbiota, and especially of taxa that were enriched in the cases gut microbiota.



**ESM Fig. 4 Faecal transfer from human donors with distinct glucose regulation in germfree Swiss Webster mice.** (a) Glucose tolerance test of germfree Swiss Webster mice colonized with faecal microbiota from a screen detected diabetic donor (cases 1, n = 6) and a BMI matched control donor (controls 1, n = 5) (colonization 1); (b) Glucose stimulated insulin secretion during glucose tolerance test on mice from a; (c) Fasting blood glucose derived immediately before the glucose tolerance test described in a. (d) Glucose tolerance test of germfree Swiss Webster mice colonized with faecal microbiota from a screen detected diabetic donor (cases 2, n = 6) and a BMI-discrepant control donor (controls 2, n = 6) (colonization 2); (e) Fasting blood glucose derived immediately before the glucose tolerance test described in d. Mice were fed regular chow diet and glucose tolerance tests were performed two weeks after colonization. Data are presented as mean  $\pm$  SE and statistical evaluation was performed by two-way ANOVA, repeated measurements with Bonferroni post hoc test (a-b and d) and Wilcoxon rank-sum tests (c and e). \*  $p < 0.05$  between controls and cases. White colour: controls. Grey colour: cases.

(f) Principal coordinate analysis (PCoA) plot of faecal microbiota composition in the Swiss Webster colonized mice based on weighted UniFrac. The dots in the PCoA plot indicate caecal samples collected at the termination of the experiment; the values in brackets on the axes show the percentage of variation explained by the first three principal coordinates (PC). We observed clustering of samples according to both colonization experiment (colonization 1 vs 2;  $p = 0.001$ ,  $r^2 = 0.286$ ; Adonis 999 permutations) and inoculum (cases vs controls inoculum;  $p = 0.001$ ,  $r^2 = 0.302$ ; Adonis 999 permutations). (g) Tukey box plots showing weighted UniFrac distances calculated to measure the dissimilarity of overall microbiota composition between mouse caecal samples and inoculum (0=identical; 1=completely different). The results show that controls from colonization 2 were highly and equally different from both the control and case inoculum, while controls from colonization 1 tended to be more similar to the case inoculum. This observation could explain why the diabetic phenotype of the donors did not precipitate in the recipient mice (\*\*  $p < 0.001$  according to Wilcoxon rank-sum test). (h) Bar plots showing the mean relative abundance of all microbial genera (n=65) identified in the inocula and in the caecal samples of the recipient mice. (i) Bar plots showing the relative abundance in the cases and control inocula of the five microbial genera that differed significantly in the human cohort. (j) Tukey box plots indicating the relative abundance of the five genera in the mouse caecal samples at the end of the two-week colonization period (\*\*  $p < 0.001$  between controls and cases in the same colonization experiment and according to Wilcoxon rank-sum test). (k) Bar plots showing the relative abundance in the cases and control inocula of the microbial OTUs that differed significantly in the human cohort; 23 out of the 36 OTUs that differed significantly in the human cohort were found among the highly abundant OTUs present in the inocula and in the mouse samples (19 OTUs, on the left of the dotted line, had increased abundance in the controls in the human cohort while 4 OTUs, on the right of the dotted line, had increased abundance in the cases in the human cohort (ESM Table 3); the identification numbers of the OTUs are indicated in the plots). (l) Tukey box plots showing the relative abundance of the 23/36 OTUs that differed significantly in the human cohort and that were found in the inocula and in the mouse caecal samples. Statistical evaluation was performed by Wilcoxon rank-sum test;  $p$  values for the comparisons of relative abundances between controls and cases in the same colonization experiment are listed in ESM Table 6. These results show that only part of the key microbial taxa were similarly differentially abundant in the recipient germfree Swiss Webster mice and in the human cohort (ESM Table 6).
